# Supplementary material
Source: PubMed Central journal article supplement (PMC5496030)
Supplement: 10.1194_M073882_jlr.M073882-1.pdf [file 10.1194_M073882_jlr.M073882-1.pdf]

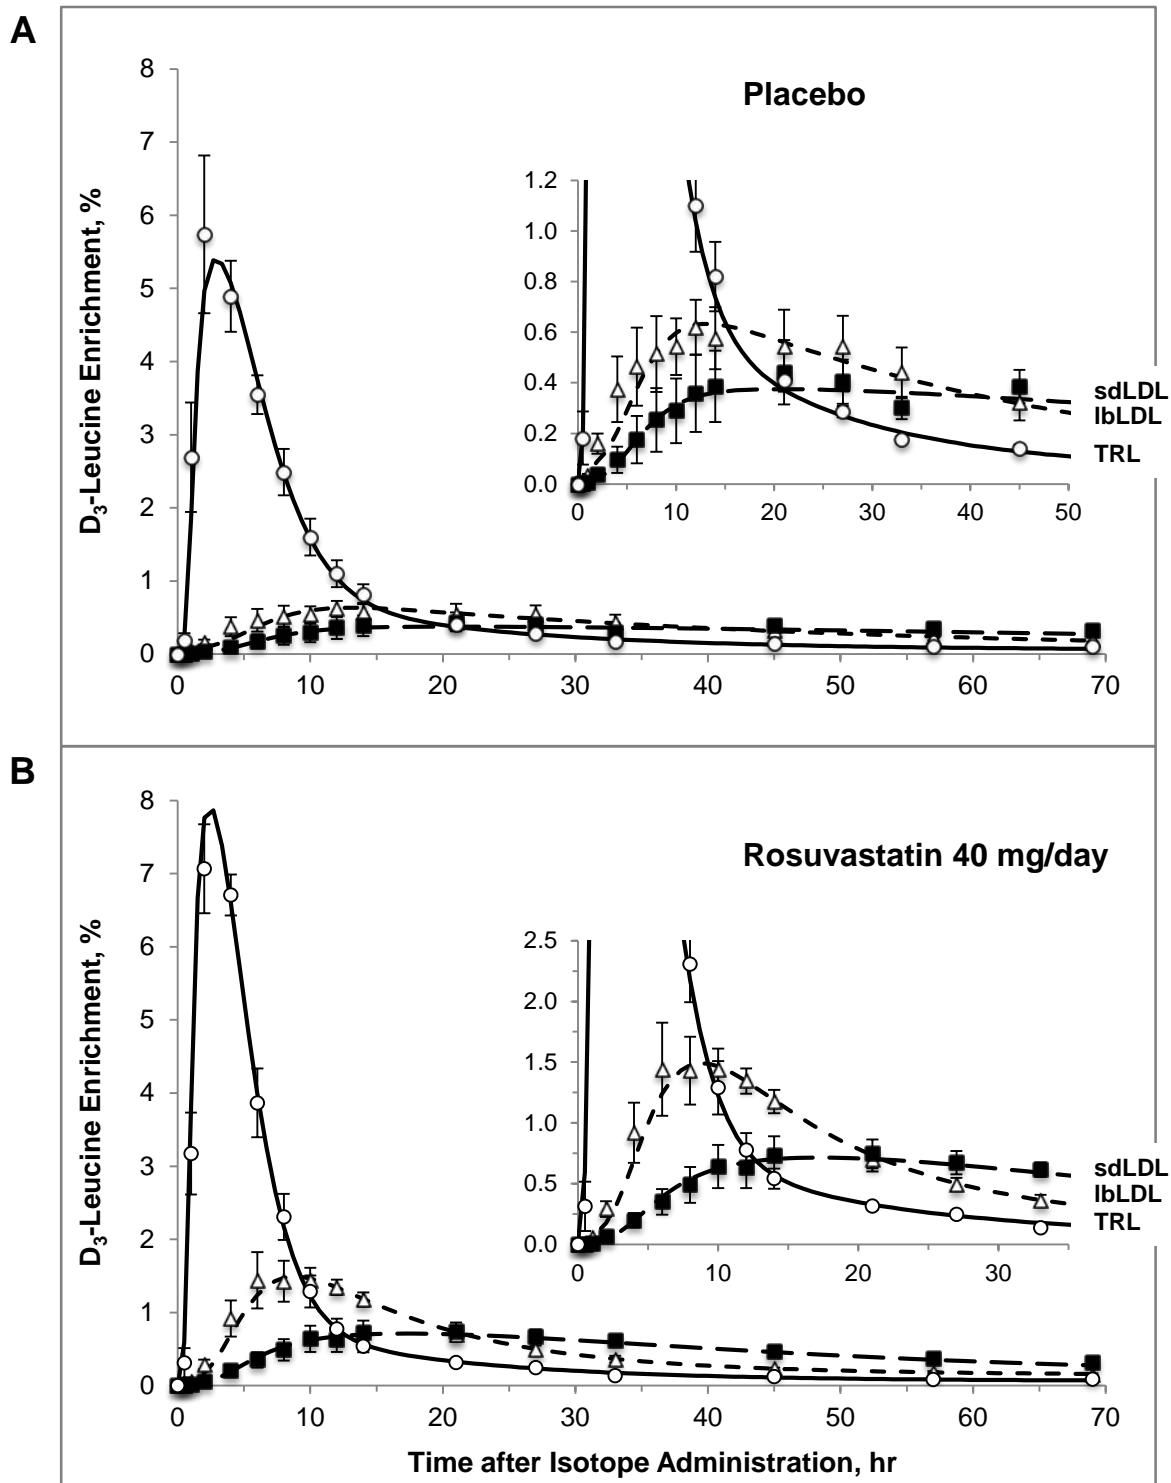

**Supplemental Fig. S1.** D<sub>3</sub>-Leucine enrichment of apoB-100 in TRL, IbLDL, and sdLDL.

**Supplemental Fig. S1.** D<sub>3</sub>-Leucine enrichment of apoB-100 in TRL, lbLDL, and sdLDL. The graphs show the fit of the enrichment curves to the compartment model during the placebo (Panel A) and rosuvastatin 40 mg/day (Panel B) phases. The inset graphs in each panel depict the precursor-product relationships between the three lipoprotein fractions. The points represent the D<sub>3</sub>-leucine enrichment (mean ± SEM, n = 6) calculated from the GC-MS analysis; the lines, the model-predicted values. Open circles and solid line depict apoB-100 in TRL apoB-100; open triangles and dotted line, apoB-100 in lbLDL; closed squares and dashed line, apoB-100 in sdLDL.
