# Supplementary material
Source: PubMed Central journal article supplement (PMC5496030)
Supplement: 10.1194_M073882_jlr.M073882-4.pdf [file 10.1194_M073882_jlr.M073882-4.pdf]

SUPPLEMENTAL TABLE 3. Residence time of apoB in LDL subfractions as determined by metabolic studies using endogenous isotopic labeling

| Reference                    | Subjects                              | Study Design<br><i>tracer, method administered;<br/>prandial state</i>                                                    | LDL Subfraction Isolation<br><i>method; density of LDL<br/>subfractions (g/ml)</i>                                                                                     | ApoB Residence Time<br><i>(day)<sup>a</sup></i> |                          |
|------------------------------|---------------------------------------|---------------------------------------------------------------------------------------------------------------------------|------------------------------------------------------------------------------------------------------------------------------------------------------------------------|-------------------------------------------------|--------------------------|
|                              |                                       |                                                                                                                           |                                                                                                                                                                        | lbLDL                                           | sdLDL                    |
| Campos <sup>1</sup>          | 8 postmenopausal women                | [D <sub>3</sub> ]L-leucine, 14 h PCI;<br>3 fat-free meals 60% of calories                                                 | Sequential density uc:<br>lbLDL <i>d</i> 1.019-1.035;<br>sdLDL <i>d</i> 1.036-1.063                                                                                    | 1.69<br>[1.16-4.55]                             | 2.44<br>[1.69-4.55]      |
| Aguilar-Salinas <sup>2</sup> | 5 FCHL                                | <sup>13</sup> C-leucine, 8 h PCI;<br>fasting 16 h during and after<br>infusion                                            | Sequential density uc:<br>lbLDL <i>d</i> 1.019-1.035;<br>sdLDL <i>d</i> 1.036-1.063                                                                                    | 1.31 (0.21) <sup>b</sup>                        | 5.11 (1.08) <sup>b</sup> |
| Zheng <sup>3</sup>           | 12 normolipidemia<br>(6 men, 6 women) | [D <sub>3</sub> ]L-leucine, 15 h PCI and<br>[D <sub>5</sub> ] L-phenylalanine, bolus;<br>2 fat-free meals 60% of calories | Immunoaffinity<br>chromatography and<br>sequential density uc:<br>lbLDL <i>d</i> 1.025-1.032;<br>mLDL <i>d</i> 1.032-1.038;<br>sdLDL <i>d</i> 1.038-1.050 <sup>c</sup> | 0.30 <sup>d,e</sup>                             | 0.85 <sup>d</sup>        |
|                              | 9 moderate hTG<br>(4 men, 5 women)    |                                                                                                                           |                                                                                                                                                                        | 0.24 <sup>d,e</sup>                             | 1.33 <sup>d</sup>        |
| Present study                | 6 CHL<br>(3 men, 3 women)             | [D <sub>3</sub> ] L-leucine, 69 h bolus;<br>5 fat-free energy drinks per day<br>for first 48 h.                           | Sequential density uc:<br>lbLDL <i>d</i> 1.019-1.044<br>sdLDL <i>d</i> 1.044-1.063                                                                                     | 1.95 (0.48) <sup>b</sup>                        | 3.10 (0.36) <sup>b</sup> |

CHL, combined hyperlipidemia; *d*, density in g/mL; FCHL, familial combined hyperlipidemia; hTG, hypertriglyceridemia; mLDL; medium LDL; PCI, primed constant infusion; uc, ultracentrifugation

<sup>a</sup>Data expressed as mean [min-max] or mean (SEM).

<sup>b</sup>Placebo phase only, for comparison with the other studies.

<sup>c</sup>ApoB-containing lipoproteins were separated from whole plasma by immunoaffinity chromatography according to apoC and apoE content. The 4 immunofractions were further separated by sequential density ultracentrifugation.

<sup>d</sup>Data for LDL particles containing no apoE or apoC-III which make up > 90% of total LDL.

<sup>e</sup>Medium LDL (*d* 1.032-1.038 g/ml) RT: 0.67 days for normolipidemic subjects; 0.48 days for hypertriglyceridemic subjects.

## REFERENCES

1. Campos, H., B. W. Walsh, H. Judge, and F. M. Sacks. 1997. Effect of estrogen on very low density lipoprotein and low density lipoprotein subclass metabolism in postmenopausal women. *J. Clin. Endocrinol. Metab.* **82**: 3955-3963.
2. Aguilar-Salinas, C. A., P. H. R. Barrett, J. Pulai, X. L. Zhu, and G. Schonfeld. 1997. A familial combined hyperlipidemic kindred with impaired apolipoprotein B catabolism. Kinetics of apolipoprotein B during placebo and pravastatin therapy. *Arterioscler. Thromb. Vasc. Biol.* **17**: 72-82.
3. Zheng, C., C. Khoo, J. Furtado, and F. M. Sacks. Apolipoprotein C-III and the metabolic basis for hypertriglyceridemia and the dense low-density lipoprotein phenotype. 2010. *Circulation.* **121**: 1722-1734.
